# Supplementary material
Source: Research Square preprint supplement (doi:10.21203/rs.3.rs-9193320/v1)
Supplement: Supplementary file 1 [file 255c571335733e1c5f366395.docx]

**[*Supplementary Material*]**

**Urban–Rural and Racial Disparities in Paediatric Congenital Heart Disease Mortality in the United States, 1999–2020**

**Supplementary Table 1.** Overall and Urban v/s Rural deaths in the United States from 1999 to 2020.


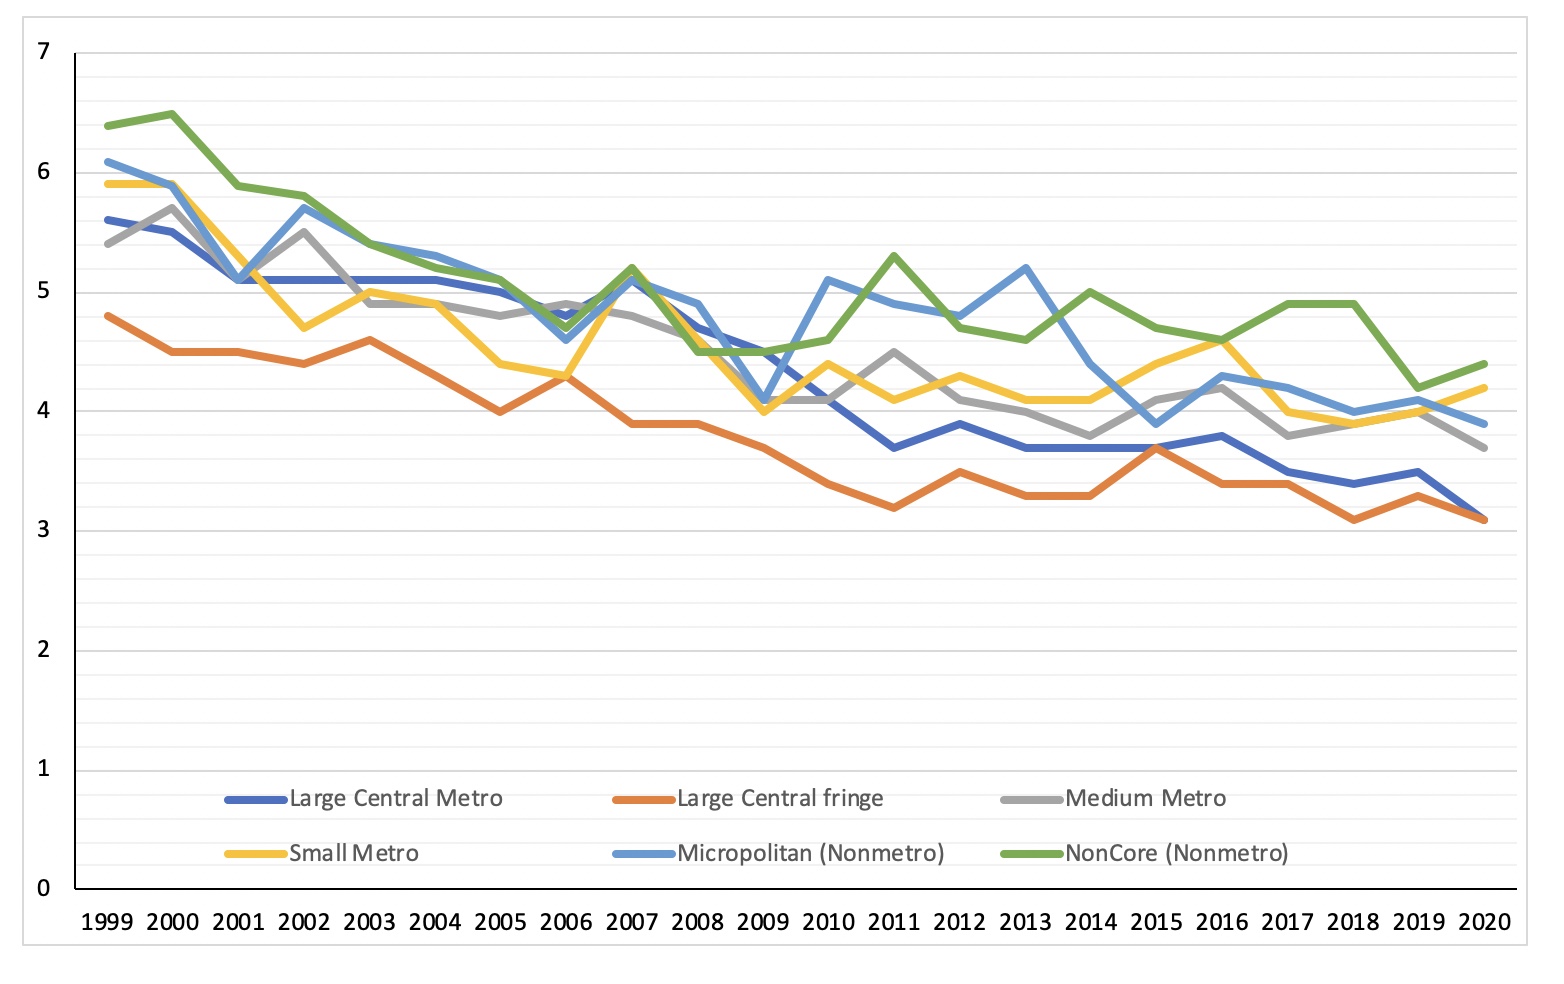
**Supplementary Chart 1.**

Line Chart comparison of Age-adjusted mortality rates (per 100,000) among children with congenital heart disease under the 2013 NCHS rural urban classification scheme.


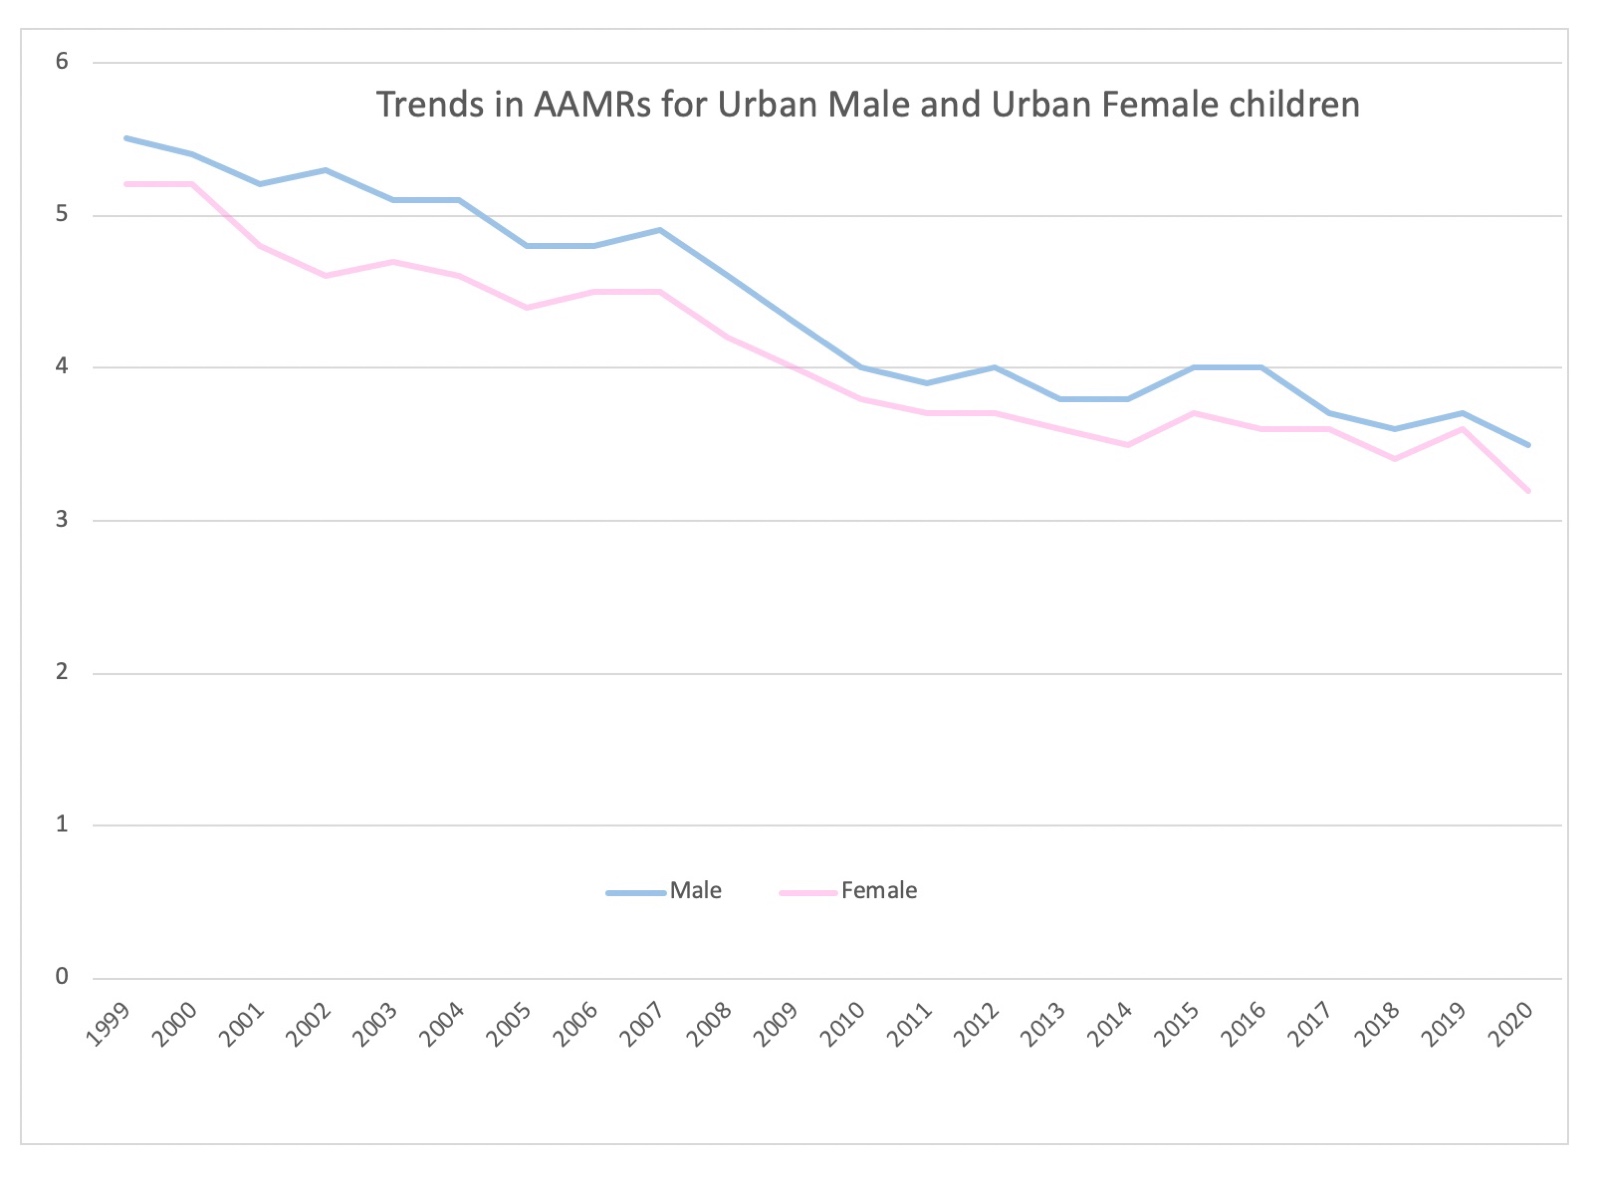


**Supplementary Chart 2.**

Line Chart comparison of Age-adjusted mortality rates (per 100,000) among urban children with congenital heart disease, stratified by sex, United States, 1999-2020.


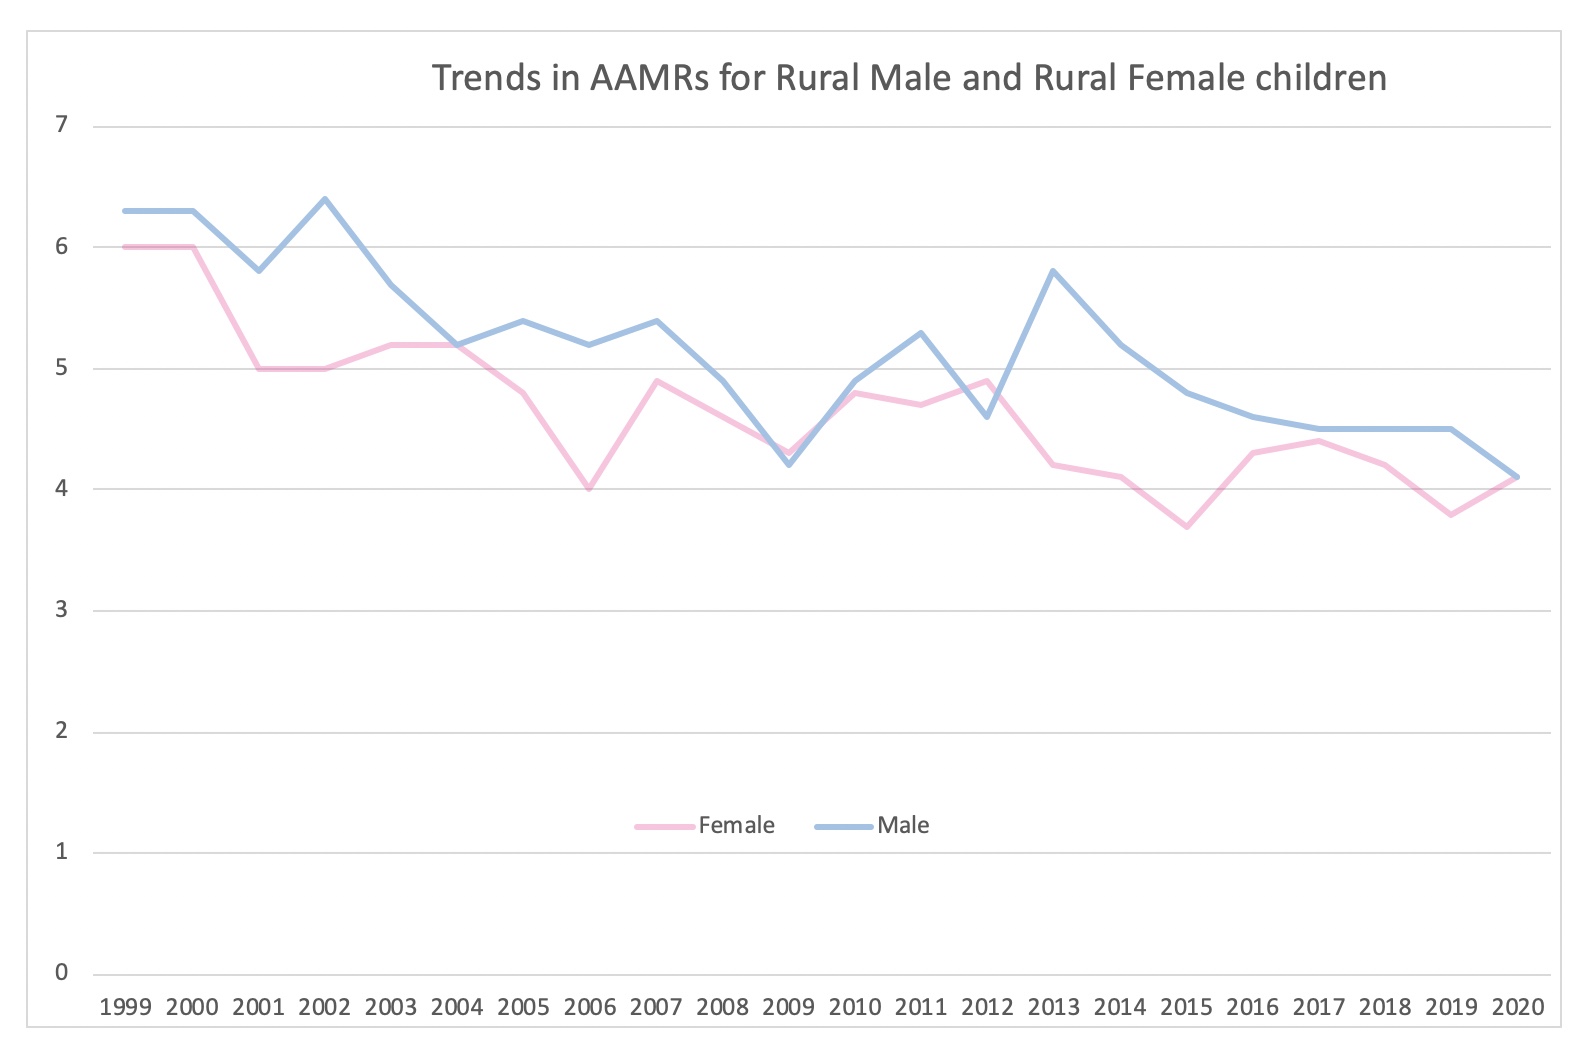


**Supplementary Chart 3.**

Line Chart comparison of Age-adjusted mortality rates (per 100,000) among rural children with congenital heart disease, stratified by sex, United States, 1999-2020.


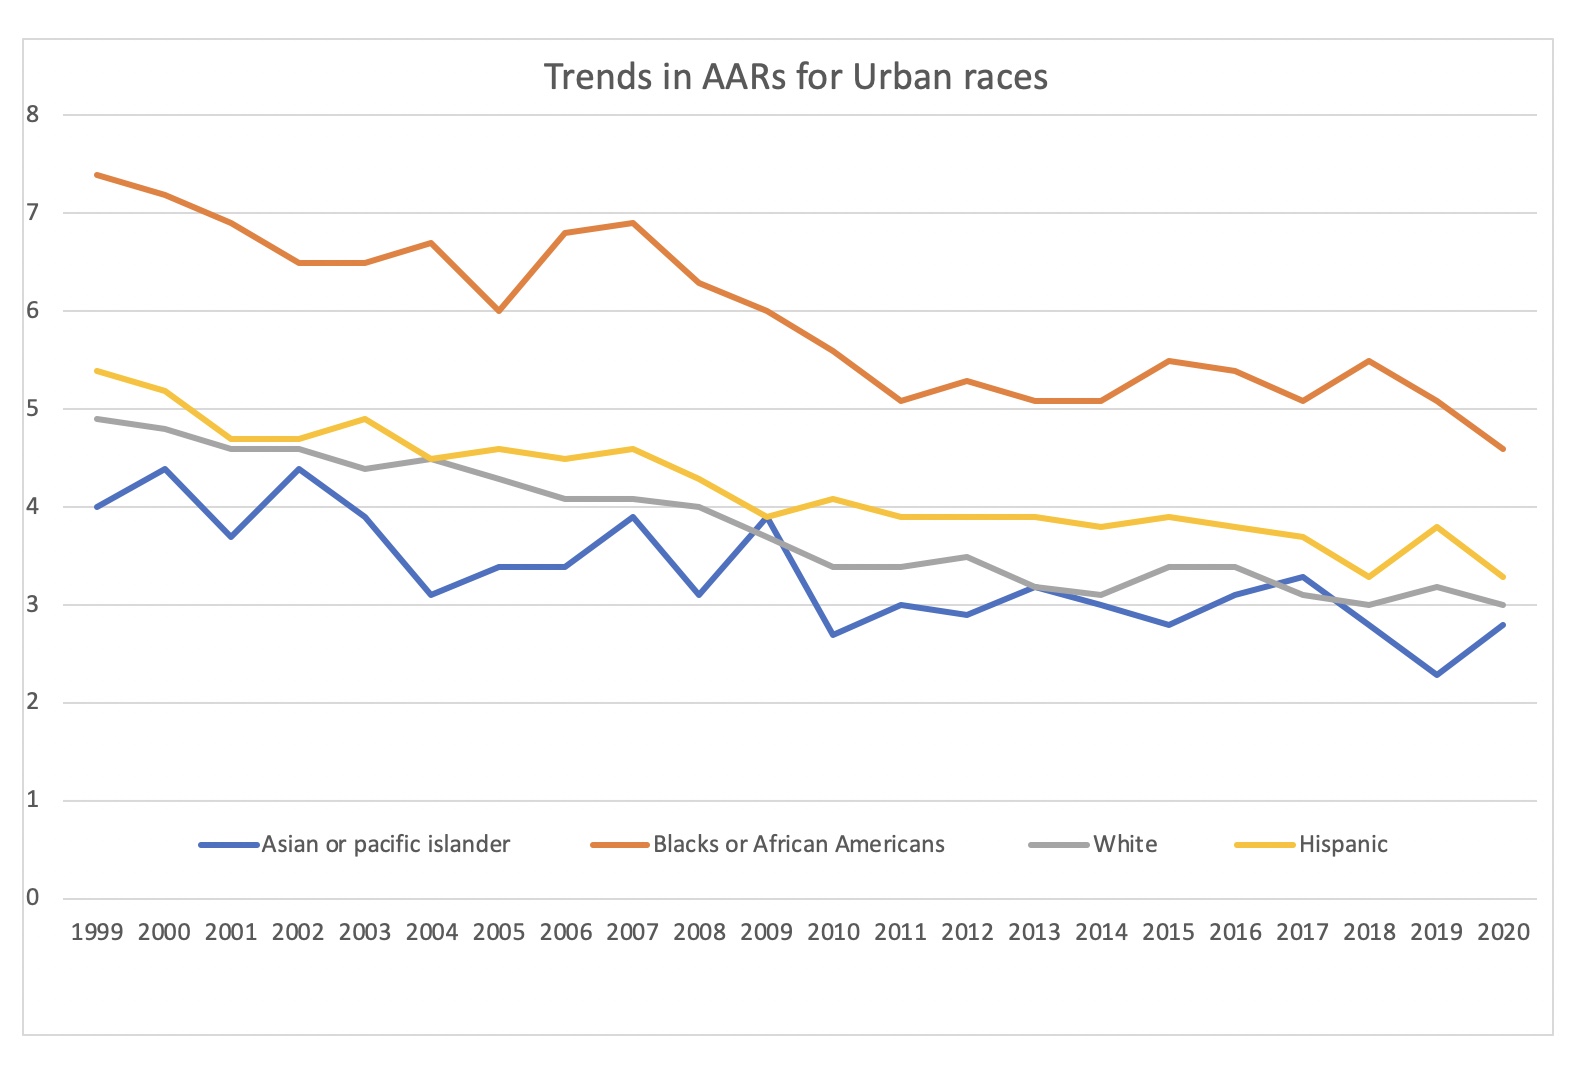


**Supplementary Chart 4.**

Line Chart comparison of Age-adjusted mortality rates (per 100,000) among urban children with congenital heart disease, stratified by race/ethnicity, United States, 1999-2020.


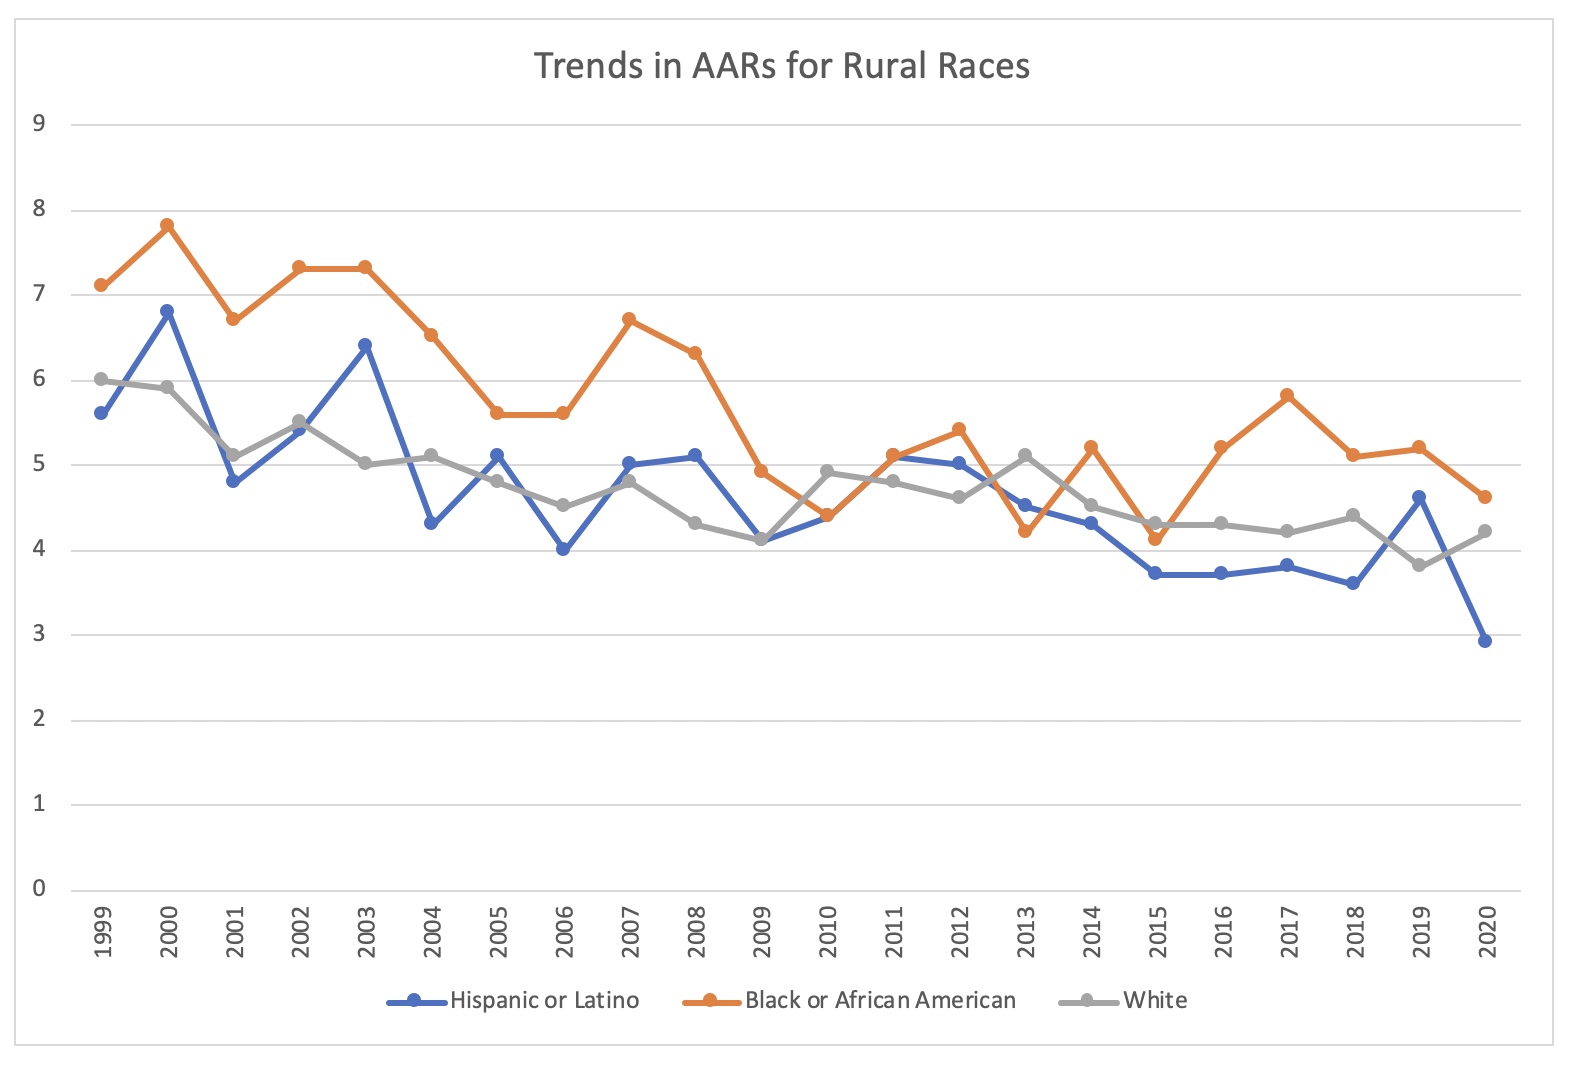


**Supplementary Chart 5.**

Line Chart comparison of Age-adjusted mortality rates (per 100,000) among rural children with congenital heart disease, stratified by race/ethnicity, United States, 1999-2020.


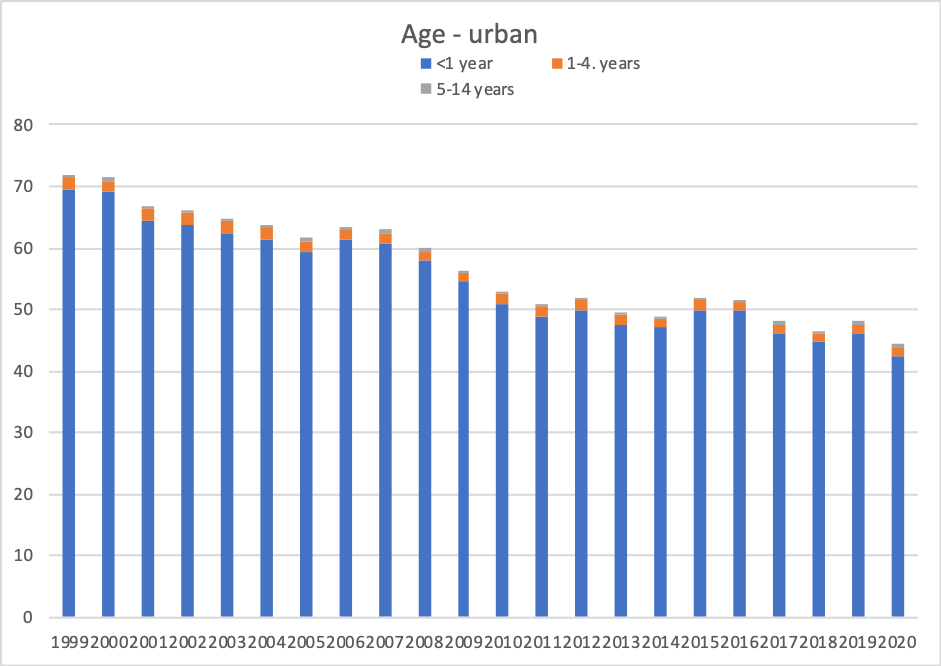


**Supplementary Chart 6.**

Column Chart comparison of crude mortality data stratified by age groups for the Urban population during 1999 -2020.


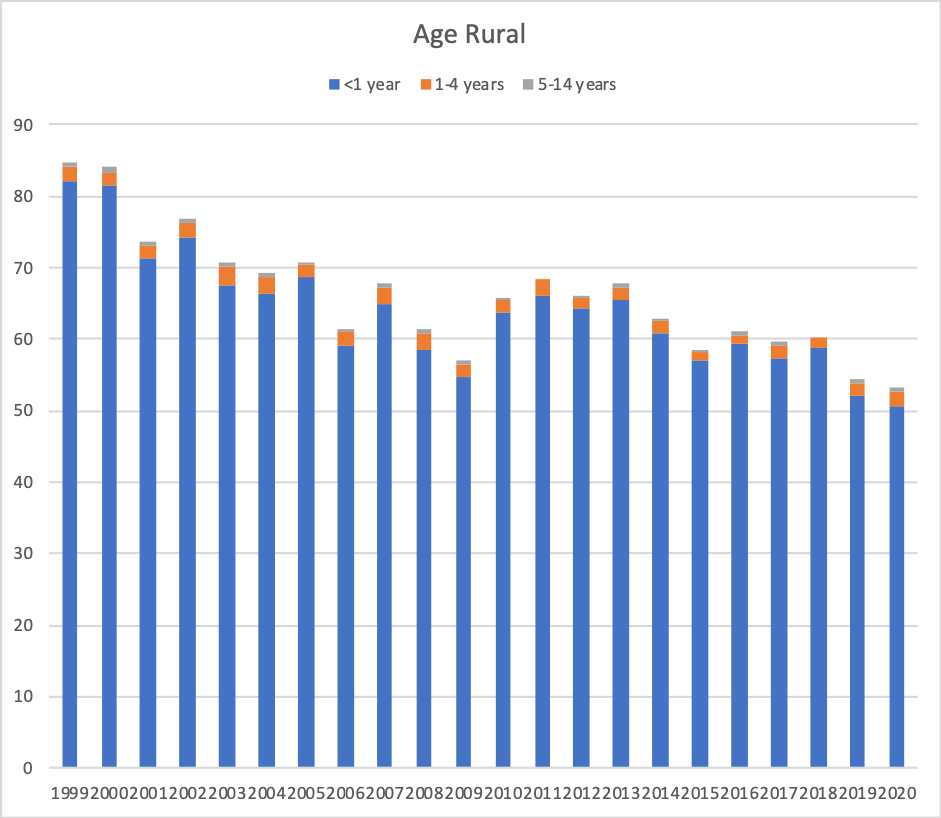


**Supplementary Chart 7.**

Column Chart comparison of crude mortality data stratified by age groups for the Rural population during 1999 -2020.


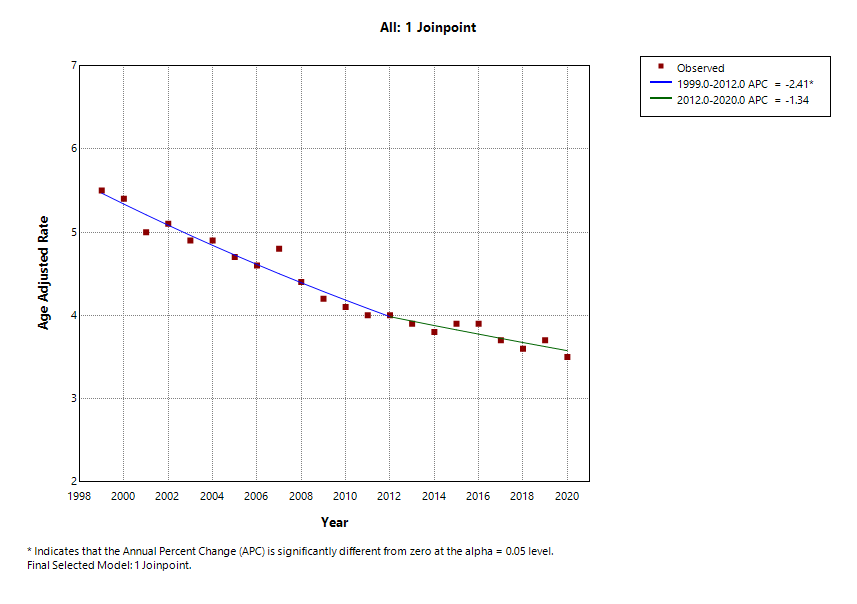


**Supplementary Figure 1.**

Joinpoint analysis of Age-adjusted mortality rates (per 100,000) among children with congenital heart disease, United States, 1999-2020.


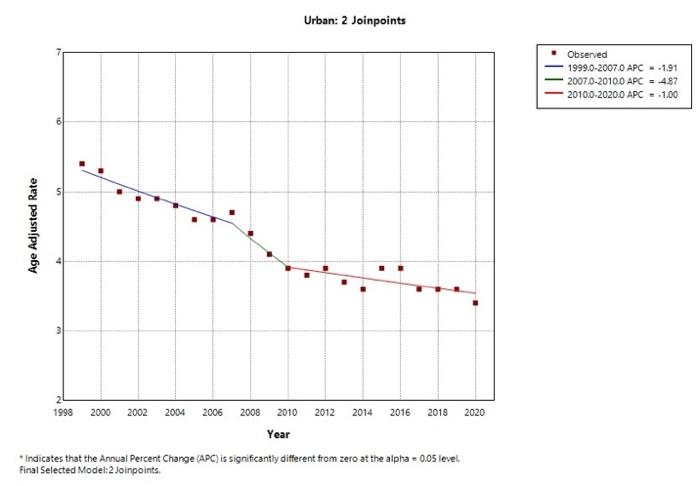


**Supplementary Figure 2**.

Joinpoint analysis of Age-adjusted mortality rates (per 100,000) among urban children with congenital heart disease, United States, 1999-2020.


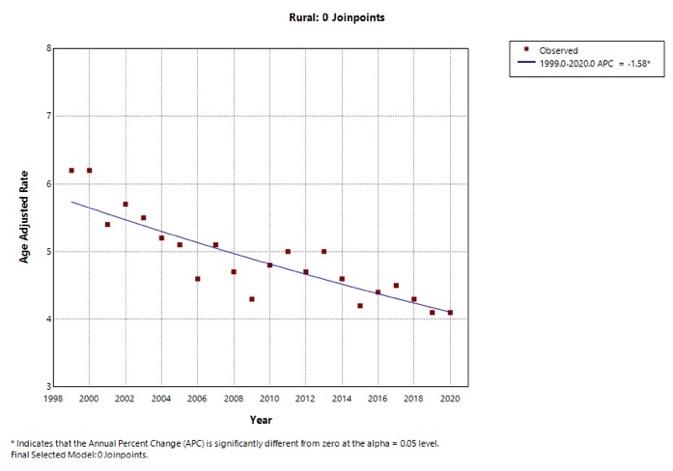


**Supplementary Figure 3.**

Joinpoint analysis of Age-adjusted mortality rates (per 100,000) among rural children with congenital heart disease, United States, 1999-2020.


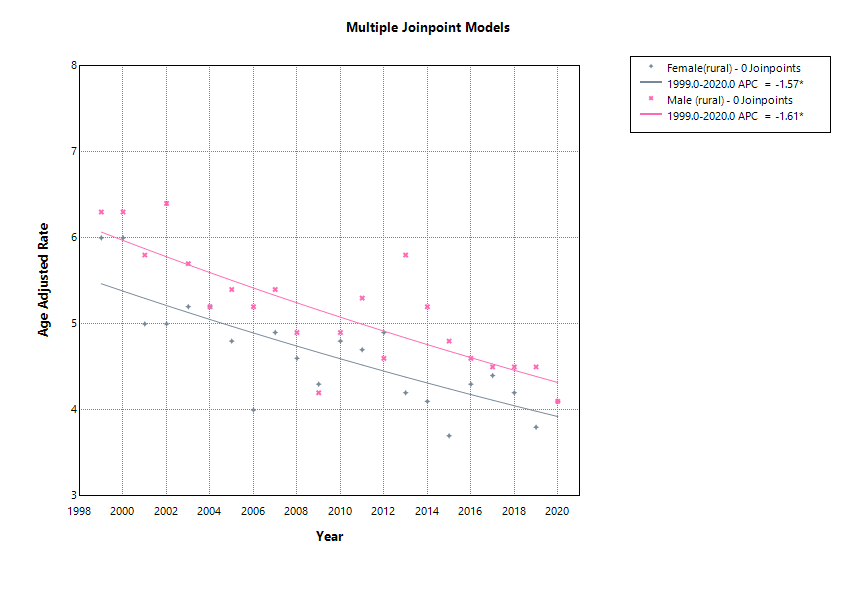


**Supplementary Figure 4**Joinpoint analysis of Age-adjusted mortality rates (per 100,000) among rural children with congenital heart disease, stratified by sex, United States, 1999-2020.


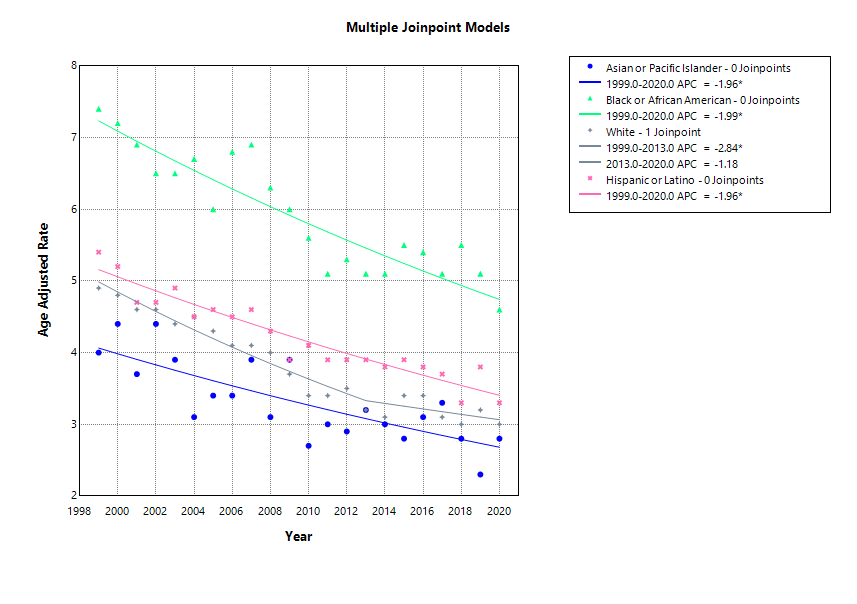


**Supplementary Figure 5**Joinpoint analysis of Age-adjusted mortality rates (per 100,000) among urban children with congenital heart disease, stratified by race/ethnicity, United States, 1999-2020.
